# Supplementary material for: Antimicrobial Resistance Patterns and Risk Factors Associated with ESBL-Producing and MDR Escherichia coli in Hospital and Environmental Settings in Lusaka, Zambia: Implications for One Health, Antimicrobial Stewardship and Surveillance Systems
Source: MDPI journal article supplement (doi:10.3390/microorganisms11081951), 2023-07-31
Supplement: s1 [file s1]

Article

# Antimicrobial Resistance Patterns and Risk Factors Associated with ESBL-Producing and MDR *Escherichia coli* in Hospital and Environmental Settings in Lusaka, Zambia: Implications for One Health, Antimicrobial Stewardship and Surveillance Systems

**Table S1.** Antimicrobial Susceptibility of Clinical *E. coli* categorized according to sample types.

**Table S2.** Antimicrobial Susceptibility of Clinical *E. coli* categorized according to hospital departments.

**Table S3.** Antimicrobial Susceptibility of Environmental *E. coli* categorized according to sample types.

**Figure S1.** Distribution of MDR and XDR environmental *E. coli* isolates categorized according to sample types.

**Figure S2.** Distribution of MDR and XDR clinical *E. coli* isolates categorized according to sample types.

**Figure S3.** Distribution of MDR and XDR clinical *E. coli* isolates categorized according to hospital departments.

**Table S1.** Antimicrobial Susceptibility of Clinical *E. coli* categorized according to sample types

| Antibiotics | Specimen types (n, %) |           |           |            |          | Total (n)   |
|-------------|-----------------------|-----------|-----------|------------|----------|-------------|
|             | Blood                 | CSF       | Pus       | Stool      | Urine    |             |
| CN          | S                     | 9 (75%)   | 9 (81.8%) | 53 (88.3%) | 2 (100%) | 208 (84.2%) |
|             | I                     | 0 (0%)    | 1 (9.1%)  | 1 (1.7%)   | 0 (0%)   | 5 (2%)      |
|             | R                     | 3 (25%)   | 1 (9.1%)  | 6 (10%)    | 0 (0%)   | 34 (13.8%)  |
| ETP         | S                     | 12 (100%) | 11 (100%) | 56 (93.3%) | 2 (100%) | 245 (99.2%) |
|             | I                     | 0 (0%)    | 0 (0%)    | 2 (3.3%)   | 0 (0%)   | 2 (0.8%)    |

|     |   |            |            |            |          |             |     |
|-----|---|------------|------------|------------|----------|-------------|-----|
|     | R | 0 (0%)     | 0 (0%)     | 2 (3.3%)   | 0 (0%)   | 0 (0%)      | 2   |
|     | S | 12 (100%)  | 11 (100%)  | 56 (93.3%) | 2 (100%) | 247 (100%)  | 328 |
| IPM | I | 0 (0%)     | 0 (0%)     | 2 (3.3%)   | 0 (0%)   | 0 (0%)      | 2   |
|     | R | 0 (0%)     | 0 (0%)     | 2 (3.3%)   | 0 (0%)   | 0 (0%)      | 2   |
|     | S | 0 (0%)     | 0 (0%)     | 5 (8.3%)   | 1 (50%)  | 107 (43.3%) | 113 |
| KZ  | I | 0 (0%)     | 0 (0%)     | 3 (5%)     | 1 (50%)  | 0 (0%)      | 4   |
|     | R | 12 (100%)  | 11 (100%)  | 52 (86.7%) | 0 (0%)   | 140 (56.7%) | 215 |
|     | S | 0 (0%)     | 0 (0%)     | 8 (13.3%)  | 2 (100%) | 107 (43.3%) | 117 |
| CXM | I | 0 (0%)     | 0 (0%)     | 2 (3.3%)   | 0 (0%)   | 6 (2.4%)    | 8   |
|     | R | 12 (100%)  | 11 (100%)  | 50 (83.3%) | 0 (0%)   | 134 (54.3%) | 207 |
|     | S | 4 (33.3%)  | 1 (9.1%)   | 25 (41.7%) | 2 (100%) | 125 (50.6%) | 157 |
| CAZ | I | 0 (0%)     | 0 (0%)     | 2 (3.3%)   | 0 (0%)   | 7 (2.8%)    | 9   |
|     | R | 8 (66.7%)  | 10 (90.9%) | 33 (55%)   | 0 (0%)   | 115 (46.6%) | 166 |
|     | S | 0 (0%)     | 0 (0%)     | 10 (16.7%) | 2 (100%) | 111 (44.9%) | 123 |
| CRO | R | 12 (100%)  | 11 (100%)  | 50 (83.3%) | 0 (0%)   | 136 (55.1%) | 209 |
|     | S | 2 (16.7%)  | 1 (9.1%)   | 25 (41.7%) | 2 (100%) | 129 (52.2%) | 159 |
| FEP | R | 10 (83.3%) | 10 (90.9%) | 35 (58.3%) | 0 (0%)   | 118 (47.8%) | 173 |
|     | S | 0 (0%)     | 0 (0%)     | 5 (8.3%)   | 0 (0%)   | 50 (20.2%)  | 55  |
| AMP | R | 12 (100%)  | 11 (100%)  | 55 (91.7%) | 2 (100%) | 197 (79.8%) | 277 |
|     | S | 4 (33.3%)  | 3 (27.3%)  | 32 (53.3%) | 0 (0%)   | 79 (32%)    | 118 |
| AMC | I | 6 (50%)    | 0 (0%)     | 10 (16.7%) | 0 (0%)   | 82 (33.2%)  | 98  |
|     | R | 2 (16.7%)  | 8 (72.7%)  | 18 (30%)   | 2 (100%) | 86 (34.8%)  | 116 |
|     | S | 0 (0%)     | 2 (18.2%)  | 10 (16.7%) | 2 (100%) | 73 (29.6%)  | 87  |
| SXT | R | 12 (100%)  | 9 (81.8%)  | 50 (83.3%) | 0 (0%)   | 174 (70.4%) | 245 |
|     | S | 10 (83.3%) | 11 (100%)  | 58 (96.7%) | 2 (100%) | 217 (87.9%) | 298 |
| NIT | I | 0 (0%)     | 0 (0%)     | 0 (0%)     | 0 (0%)   | 18 (7.3%)   | 18  |
|     | R | 2 (16.7%)  | 0 (0%)     | 2 (3.3%)   | 0 (0%)   | 12 (4.9%)   | 16  |
|     | S | 2 (16.7%)  | 0 (0%)     | 18 (30%)   | 2 (100%) | 91 (36.8%)  | 113 |
| CIP | I | 0 (0%)     | 0 (0%)     | 0 (0%)     | 0 (0%)   | 1 (0.4%)    | 1   |
|     | R | 10 (83.3%) | 11 (100%)  | 42 (70%)   | 0 (0%)   | 155 (62.8%) | 218 |
|     | S | 2 (16.7%)  | 0 (0%)     | 17 (28.3%) | 2 (100%) | 98 (39.7%)  | 119 |
| LEV | R | 10 (83.3%) | 11 (100%)  | 43 (71.7%) | 0 (0%)   | 149 (60.3%) | 213 |

Abbreviations: AMC-Amoxicillin/clavulanic acid; FEP-Cefepime; CN-Gentamicin; AMP- Ampicillin; IMP-Imipenem; CAZ-Ceftazidime; KZ-Cephazolin; CIP-Ciprofloxacin; LEV-Levofloxacin; NIT-Nitrofurantoin; CRO-Ceftriaxone; CXM-Cefuroxime; SXT-Sulfamethoxazole/trimethoprim; ETP-Ertapenem

**Table S2.** Antimicrobial Susceptibility of Clinical *E. coli* categorized according to hospital departments

| Antibiotics | Hospital departments (n, %) |               |                     |       |                       |                            |         | Total (n) |
|-------------|-----------------------------|---------------|---------------------|-------|-----------------------|----------------------------|---------|-----------|
|             | Admission                   | General adult | Intensive care unit | OBGYN | Outpatient department | Pediatrics and neonatology | Surgery |           |

|     |   |           |            |            |            |             |            |          |     |
|-----|---|-----------|------------|------------|------------|-------------|------------|----------|-----|
| CN  | S | 7 (87.5%) | 46 (88.5%) | 15 (71.4%) | 34 (89.5%) | 95 (80.5%)  | 43 (95.6%) | 41 (82%) | 281 |
|     | R | 1 (12.5%) | 6 (11.5%)  | 6 (28.6%)  | 3 (7.9%)   | 19 (16.1%)  | 1 (2.2%)   | 8 (16%)  | 44  |
| ETP | S | 8 (100%)  | 52 (100%)  | 19 (90.5%) | 38 (100%)  | 115 (97.5%) | 45 (100%)  | 49 (98%) | 326 |
|     | R | 0 (0%)    | 0 (0%)     | 0 (0%)     | 0 (0%)     | 1 (0.8%)    | 0 (0%)     | 1 (2%)   | 2   |
| IPM | S | 8 (100%)  | 52 (100%)  | 21 (100%)  | 36 (94.7%) | 117 (99.2%) | 45 (100%)  | 49 (98%) | 328 |
|     | R | 0 (0%)    | 0 (0%)     | 0 (0%)     | 0 (0%)     | 1 (0.8%)    | 0 (0%)     | 1 (2%)   | 2   |
| KZ  | S | 6 (75%)   | 13 (25%)   | 3 (14.3%)  | 15 (39.5%) | 53 (44.9%)  | 12 (26.7%) | 11 (22%) | 113 |
|     | R | 2 (25%)   | 39 (75%)   | 18 (85.7%) | 23 (60.5%) | 64 (54.2%)  | 33 (73.3%) | 36 (72%) | 215 |
| CXM | S | 6 (75%)   | 14 (26.9%) | 3 (14.3%)  | 15 (39.5%) | 54 (45.8%)  | 12 (26.7%) | 13 (26%) | 117 |
|     | R | 2 (25%)   | 37 (71.2%) | 18 (85.7%) | 20 (52.6%) | 60 (50.8%)  | 33 (73.3%) | 37 (74%) | 207 |
| CAZ | S | 6 (75%)   | 21 (40.4%) | 7 (33.3%)  | 15 (39.5%) | 63 (53.4%)  | 21 (46.7%) | 24 (48%) | 157 |
|     | R | 2 (25%)   | 29 (55.8%) | 14 (66.7%) | 21 (55.3%) | 52 (44.1%)  | 22 (48.9%) | 26 (52%) | 166 |
| CRO | S | 6 (75%)   | 15 (28.8%) | 3 (14.3%)  | 17 (44.7%) | 57 (48.3%)  | 12 (26.7%) | 13 (26%) | 123 |
|     | R | 2 (25%)   | 37 (71.2%) | 18 (85.7%) | 21 (55.3%) | 61 (51.7%)  | 33 (73.3%) | 37 (74%) | 209 |
| FEP | S | 6 (75%)   | 22 (42.3%) | 7 (33.3%)  | 19 (100%)  | 63 (53.4%)  | 20 (44.4%) | 22 (44%) | 159 |
|     | R | 2 (25%)   | 30 (57.7%) | 14 (66.7%) | 19 (100%)  | 55 (46.6%)  | 25 (55.6%) | 28 (56%) | 173 |
| AMP | S | 3 (37.5%) | 4 (7.7%)   | 2 (9.5%)   | 9 (23.7%)  | 21 (17.8%)  | 8 (17.8%)  | 8 (16%)  | 55  |
|     | R | 5 (62.5%) | 48 (92.3%) | 19 (90.5%) | 29 (76.3%) | 97 (82.2%)  | 37 (82.2%) | 42 (84%) | 277 |
| AMC | S | 6 (75%)   | 11 (21.2%) | 8 (38.1%)  | 18 (47.4%) | 40 (33.9%)  | 11 (24.4%) | 24 (48%) | 118 |
|     | R | 0 (0%)    | 18 (34.6%) | 8 (38.1%)  | 16 (42.1%) | 42 (35.6%)  | 19 (42.2%) | 13 (26%) | 116 |
| SXT | S | 4 (50%)   | 17 (32.7%) | 3 (14.3%)  | 7 (18.4%)  | 38 (32.2%)  | 13 (28.9%) | 5 (10%)  | 87  |
|     | R | 4 (50%)   | 35 (67.3%) | 18 (85.7%) | 31 (81.6%) | 80 (67.8%)  | 32 (71.1%) | 45 (90%) | 245 |
| NIT | S | 6 (75%)   | 43 (82.7%) | 18 (85.7%) | 36 (94.7%) | 103 (87.3%) | 43 (95.6%) | 49 (98%) | 298 |
|     | R | 0 (0%)    | 6 (11.5%)  | 2 (9.5%)   | 0 (0%)     | 6 (5.1%)    | 1 (2.2%)   | 1 (2%)   | 16  |
| CIP | S | 5 (62.5%) | 12 (23.1%) | 5 (23.8%)  | 16 (42.1%) | 43 (36.4%)  | 18 (40%)   | 14 (28%) | 113 |
|     | R | 3 (37.5%) | 40 (76.9%) | 16 (76.2%) | 22 (57.9%) | 74 (62.7%)  | 27 (60%)   | 36 (72%) | 218 |
| LEV | S | 6 (75%)   | 13 (25%)   | 5 (23.8%)  | 17 (44.7%) | 47 (39.8%)  | 17 (37.8%) | 14 (28%) | 119 |
|     | R | 2 (25%)   | 39 (75%)   | 16 (76.2%) | 21 (55.3%) | 71 (60.2%)  | 28 (62.2%) | 36 (72%) | 213 |

Abbreviations: AMC-Amoxicillin/clavulanic acid; FEP-Cefepime; CN-Gentamicin; AMP- Ampicillin; IMP-Imipenem; CAZ-Ceftazidime; KZ-Cephazolin; CIP-Ciprofloxacin; LEV-Levofloxacin; NIT-Nitrofurantoin; CRO-Ceftriaxone; CXM-Cefuroxime; SXT-Sulfamethoxazole/trimethoprim; ETP-Ertapenem

**Table S3.** Antimicrobial Susceptibility of Environmental *E. coli* categorized according to sample types

| Antibiotics |   | Sample type (n, %) |            |            |            |                       |                    | Total (n) |
|-------------|---|--------------------|------------|------------|------------|-----------------------|--------------------|-----------|
|             |   | Chicken            | Fish       | Water      | meats      | Fruits and Vegetables | Hospital Equipment |           |
|             |   |                    |            |            |            |                       |                    |           |
| AMP         | S | 7 (77.8%)          | 22 (75.9%) | 22 (62.9%) | 44 (78.6%) | 44 (67.7%)            | 102 (96.2%)        | 241       |
|             | R | 2 (22.2%)          | 7 (24.1%)  | 13 (37.1%) | 12 (21.4%) | 21 (32.3%)            | 4 (3.8%)           | 59        |
| AMC         | S | 8 (88.9%)          | 22 (75.9%) | 22 (62.5%) | 52 (92.9%) | 51 (78.5%)            | 83 (78.3%)         | 238       |
|             | R | 0 (0%)             | 5 (17.2%)  | 12 (34.3%) | 3 (5.4%)   | 13 (20%)              | 20 (18.9%)         | 53        |
| KZ          | S | 9 (100%)           | 21 (72.4%) | 21 (60%)   | 47 (83.9%) | 44 (67.7%)            | 73 (68.9%)         | 215       |

|     |   |           |            |            |            |            |            |     |
|-----|---|-----------|------------|------------|------------|------------|------------|-----|
|     | R | 0 (0%)    | 8 (27.6%)  | 14 (40%)   | 9 (16.1%)  | 21 (32.3%) | 33 (31.1%) | 85  |
|     | S | 8 (88.9%) | 23 (79.3%) | 22 (62.5%) | 51 (91.1%) | 48 (73.8%) | 83 (78.3%) | 235 |
| CXM | I | 1 (11.1%) | 0 (0%)     | 0 (0%)     | 1 (1.8%)   | 0 (0%)     | 2 (1.9%)   | 4   |
|     | R | 0 (0%)    | 6 (20.7%)  | 13 (37.1%) | 4 (7.1%)   | 17 (26.2%) | 21 (19.8%) | 61  |
| CAZ | S | 9 (100%)  | 23 (79.3%) | 23 (65.7%) | 53 (94.6%) | 50 (76.9%) | 85 (80.2%) | 243 |
|     | R | 0 (0%)    | 6 (20.7%)  | 12 (34.3%) | 3 (5.4%)   | 15 (23.1%) | 21 (19.8%) | 57  |
| CRO | S | 9 (100%)  | 23 (79.3%) | 22 (62.5%) | 53 (94.6%) | 48 (73.8%) | 86 (81.1%) | 241 |
|     | R | 0 (0%)    | 6 (20.7%)  | 13 (37.1%) | 3 (5.4%)   | 17 (26.2%) | 20 (18.9%) | 59  |
| FEP | S | 9 (100%)  | 23 (79.3%) | 24 (68.6%) | 53 (94.6%) | 50 (76.9%) | 87 (82.1%) | 246 |
|     | R | 0 (0%)    | 6 (20.7%)  | 11 (31.4%) | 3 (5.4%)   | 15 (23.1%) | 19 (17.9%) | 54  |
|     | S | 9 (100%)  | 24 (82.8%) | 23 (65.7%) | 52 (92.9%) | 50 (76.9%) | 86 (81.1%) | 244 |
| CN  | I | 0 (0%)    | 0 (0%)     | 0 (0%)     | 1 (1.8%)   | 1 (1.5%)   | 0 (0%)     | 2   |
|     | R | 0 (0%)    | 5 (17.2%)  | 12 (34.3%) | 3 (5.4%)   | 14 (21.5%) | 20 (18.9%) | 54  |
|     | S | 7 (77.8%) | 21 (72.4%) | 19 (54.3%) | 48 (85.7%) | 46 (70.8%) | 84 (79.2%) | 225 |
| CIP | R | 2 (22.2%) | 8 (27.6%)  | 16 (45.7%) | 8 (14.3%)  | 19 (29.2%) | 22 (20.8%) | 75  |
| IMP | S | 9 (100%)  | 29(100%)   | 35(100%)   | 56(100%)   | 65(100%)   | 106(100%)  | 300 |
|     | R | 0 (0%)    | 0 (0%)     | 0 (0%)     | 0 (0%)     | 0 (0%)     | 0 (0%)     | 0   |
| SXT | S | 7 (77.8%) | 21 (72.4%) | 16 (45.7%) | 40 (71.4%) | 40 (61.5%) | 70 (66%)   | 194 |
|     | R | 0 (0%)    | 8 (27.6%)  | 17 (48.6%) | 12 (21.4%) | 23 (35.4%) | 35 (33%)   | 95  |
| ETP | S | 9 (100%)  | 29(100%)   | 35(100%)   | 56(100%)   | 65(100%)   | 106(100%)  | 300 |
|     | R | 0 (0%)    | 0 (0%)     | 0 (0%)     | 0 (0%)     | 0 (0%)     | 0 (0%)     | 0   |
|     | S | 6 (66.7%) | 21 (72.4%) | 18 (51.4%) | 42 (75%)   | 39 (60%)   | 74 (69.8%) | 200 |
| LEV | I | 1 (11.1%) | 0 (0%)     | 1 (2.9%)   | 3 (5.4%)   | 3 (4.6%)   | 0 (0%)     | 8   |
|     | R | 2 (22.2%) | 8 (27.6%)  | 16 (45.7%) | 11 (19.6%) | 23 (35.4%) | 32 (30.2%) | 92  |
|     | S | 9 (100%)  | 24 (82.8%) | 25 (71.4%) | 44 (78.6%) | 54 (83.1%) | 81 (76.4%) | 237 |
| NIT | I | 0 (0%)    | 1 (3.4%)   | 1 (2.9%)   | 0 (0%)     | 1 (1.5%)   | 1 (0.9%)   | 4   |
|     | R | 0 (0%)    | 4 (13.8%)  | 9 (25.7%)  | 12 (21.4%) | 10 (15.4%) | 24 (22.6%) | 59  |

Abbreviations: AMC-Amoxicillin/clavulanic acid; FEP-Cefepime; CN-Gentamicin; AMP- Ampicillin; IMP-Imipenem; CAZ-Ceftazidime; KZ-Cephazolin; CIP-Ciprofloxacin; LEV-Levofloxacin; NIT-Nitrofurantoin; CRO-Ceftriaxone; CXM-Cefuroxime; SXT-Sulfamethoxazole/trimethoprim; ETP-Ertapenem

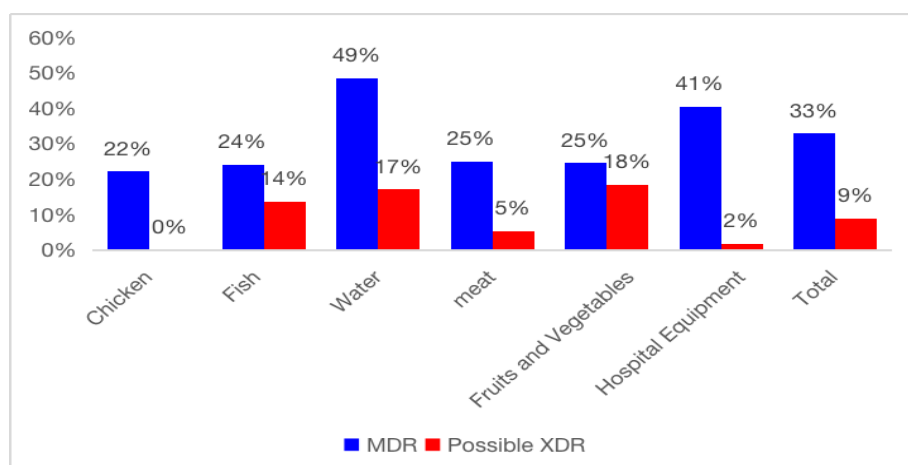

**Figure S1.** Distribution of MDR and XDR environmental *E. coli* isolates categorized according to sample types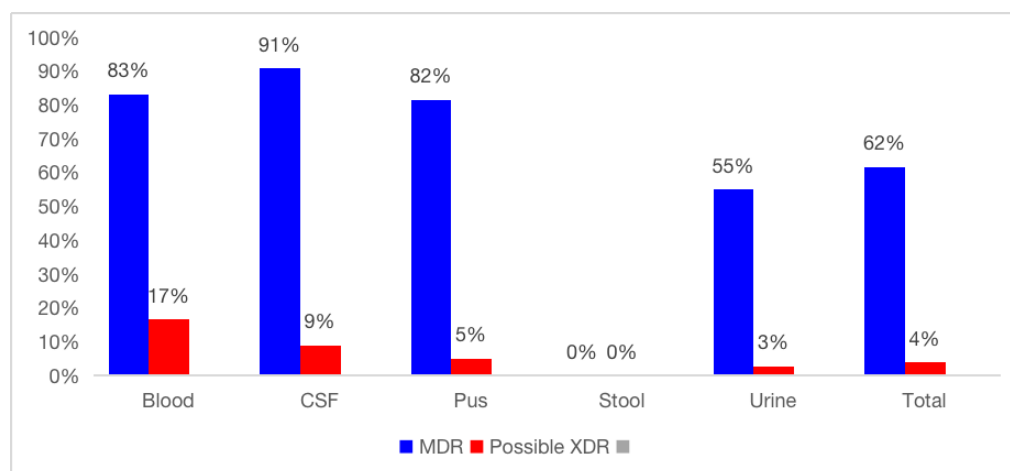**Figure S2.** Distribution of MDR and XDR clinical *E. coli* isolates categorized according to sample types.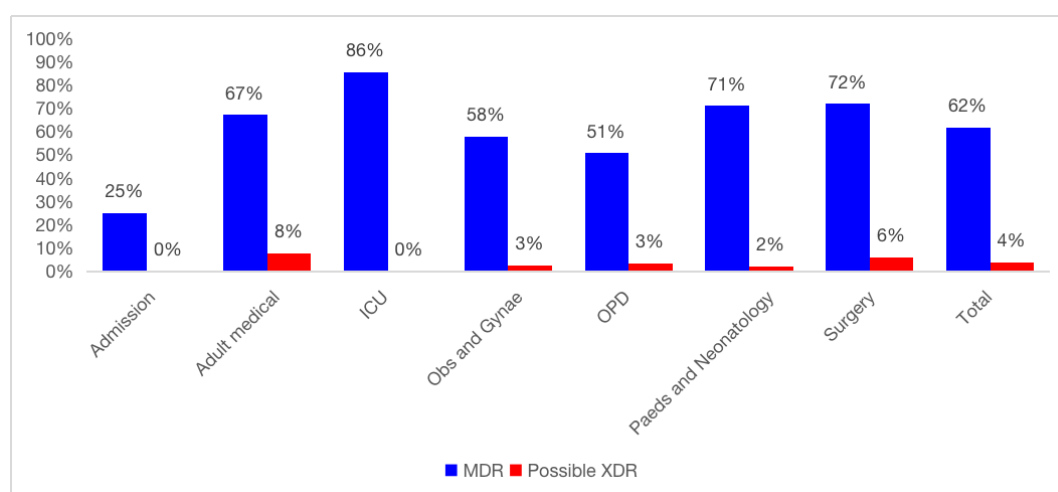**Figure S3.** Distribution of MDR and XDR clinical *E. coli* isolates categorized according to hospital departments.
